# Supplementary material
Source: PubMed Central journal article supplement (PMC6462144)
Supplement: NIHMS1021995-supplement-1.pdf [file NIHMS1021995-supplement-1.pdf]

## Supplemental Information

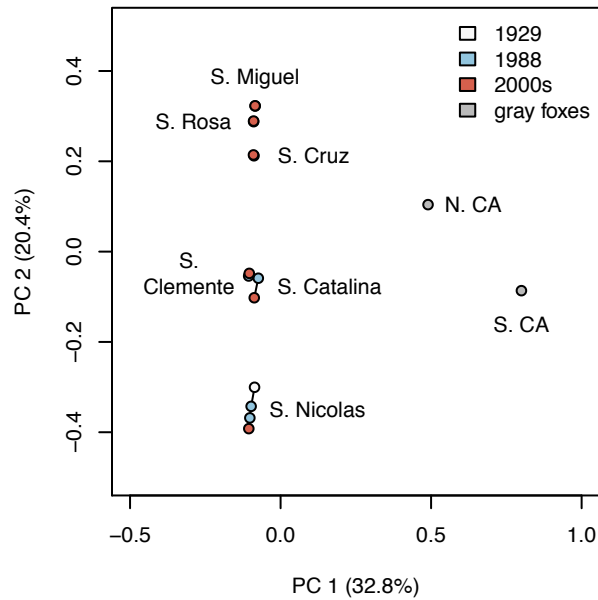

**Figure S1. Principal component analysis of gray and island fox genomes. Related to Figure 1.** Based on 12,249 SNPs pruned for linkage disequilibrium. Solid black lines connect points from the same population.

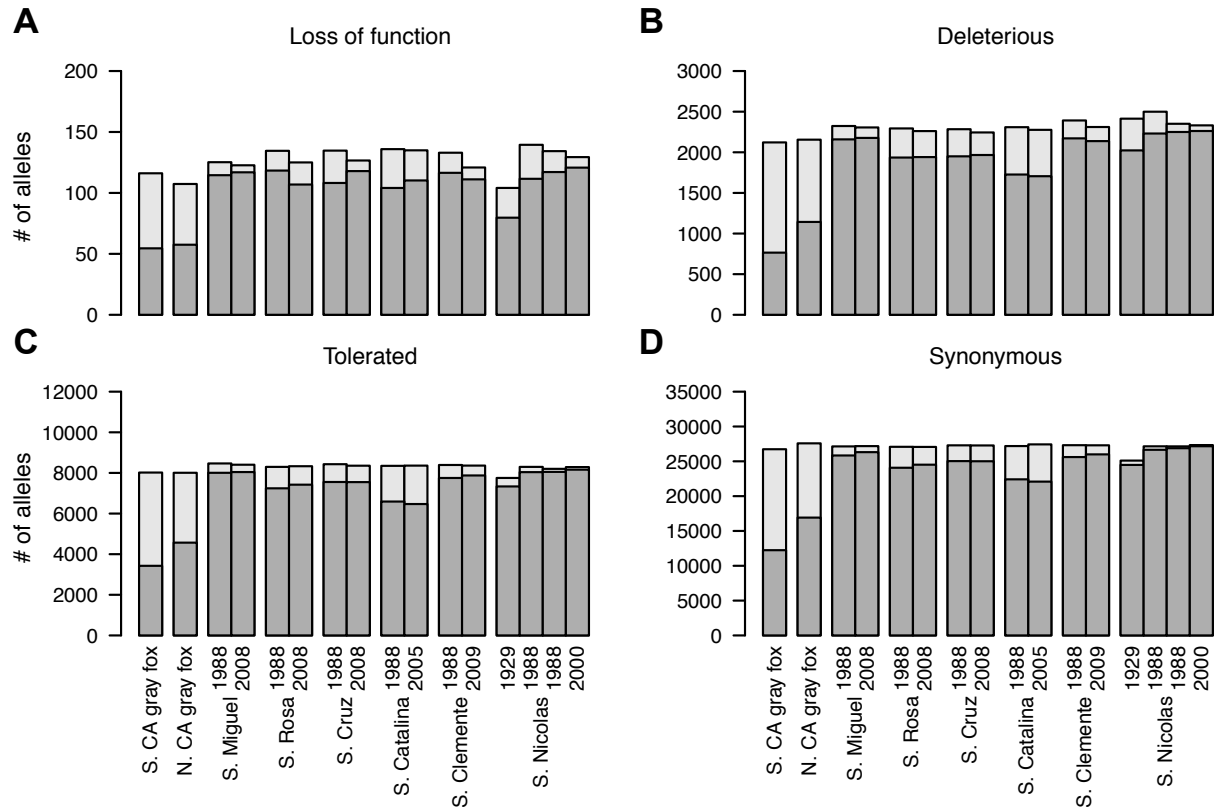

**Figure S2. Number of derived alleles in island and gray fox coding regions. Related to Figure 2.** The number of derived alleles contained in homozygous genotypes in each individual is shown in dark grey, and the total number of derived alleles in light grey. The homozygosity and total number of derived alleles is elevated at putatively deleterious variant sites in island fox genomes (see Table S4). Mutations are classified by annotation type by the Ensembl Variant Effect Predictor [VEP; S1] and the Sorting Intolerant From Tolerant algorithm [SIFT; S2]. Numbers within each category are normalized by the mean number of genotyped sites across individuals to account for differences in coverage between individuals. (A) Loss of function mutations are those that encode premature stop codons. (B, C) Deleterious and tolerated mutations are missense mutations categorized by SIFT [S2] according to whether they are predicted to be damaging. (D) Synonymous changes are mutations that do not change the encoded amino acid and are presumed to be neutral.

| Species | Location       | Sample #       | Sex | Year Sampled | Platform           | Base Pairs (Gbp) | # of reads aligned, post-filtering ( $\times 10^6$ ) | Mean depth of coverage (X) | Source     |
|---------|----------------|----------------|-----|--------------|--------------------|------------------|------------------------------------------------------|----------------------------|------------|
| ULI     | Santa Catalina | SCA16/RKW4644  | F   | 1988         | HiSeq2000, 2x100bp | 82.5             | 311                                                  | 12.8                       | [S3]       |
| ULI     | San Clemente   | SCLV4/RKW4045  | F   | 1988         | HiSeq2000, 2x100bp | 73.2             | 450                                                  | 18.7                       | [S3]       |
| ULI     | Santa Cruz     | SCZ05/RKW12331 | M   | 1988         | HiSeq2000, 2x100bp | 77.9             | 348                                                  | 14.5                       | [S3]       |
| ULI     | San Miguel     | SMI15/RKW12354 | F   | 1988         | HiSeq2000, 2x100bp | 80.5             | 559                                                  | 23.2                       | [S3]       |
| ULI     | San Nicolas    | SNI05/RKW4038  | F   | 1988         | HiSeq2000, 2x100bp | 66.1             | 339                                                  | 13.8                       | [S3]       |
| ULI     | San Nicolas    | SNI41/RKW12349 | F   | 1988         | HiSeq2000, 2x100bp | 84.3             | 328                                                  | 13.6                       | [S3]       |
| UCI     | SMMNRA         | NPS GFO41      | F   | 2012         | HiSeq2000, 2x100bp | 67.5             | 409                                                  | 17.0                       | [S3]       |
| ULI     | Santa Catalina | RKW11697       | M   | 2005         | HiSeq4000, 2x100bp | 70.8             | 526                                                  | 22.3                       | This study |
| ULI     | San Clemente   | RKW13704       | F   | 2009         | HiSeq4000, 2x100bp | 69.5             | 442                                                  | 18.7                       | This study |
| ULI     | Santa Cruz     | RKW8695        | F   | 2008         | HiSeq4000, 2x100bp | 72.3             | 511                                                  | 21.7                       | This study |
| ULI     | San Miguel     | RKW11655       | M   | 2008         | HiSeq4000, 2x100bp | 69.6             | 516                                                  | 21.9                       | This study |
| ULI     | San Nicolas    | RKW12297       | M   | 2000         | HiSeq4000, 2x100bp | 73.0             | 492                                                  | 20.9                       | This study |
| ULI     | San Nicolas    | Dickey 15477   | F   | 1929         | HiSeq4000, 1x100bp | 118.5            | 478                                                  | 15.8                       | This study |
| ULI     | Santa Rosa     | SRO13/RKW12355 | F   | 1988         | HiSeq4000, 2x100bp | 76.0             | 527                                                  | 22.2                       | This study |
| ULI     | Santa Rosa     | RKW10660       | M   | 2008         | HiSeq4000, 2x100bp | 78.0             | 534                                                  | 22.7                       | This study |
| UCI     | GOGANRA        | NPS GFO30      | M   | 1993         | HiSeq4000, 2x100bp | 70.6             | 446                                                  | 18.8                       | This study |

**Table S1. Sample information and metrics for genome sequences. Related to Figure 1.** ULI: *Urocyon littoralis*; UCI: *Urocyon cinereoargenteus*; SMMNRA: Santa Monica Mountains National Recreation Area; GOGANRA: Golden Gate National Recreation Area. In the main text and supplemental items, San Nicolas 1988 (1) refers to SNI05/RKW4038 and San Nicolas 1988 (2) refers to SNI41/RKW12349. All raw sequence reads are available for download from the NCBI Sequence Read Archive. Sequences from Robinson et al. 2016 [S3] can be found under BioProject PRJNA312115, and sequences generated for this study can be found under PRJNA478450.

| Statistic                                                                    | Empirical value | Empirical percentile | Simulated mean | Simulated 2.5th percentile | Simulated 97.5th percentile |
|------------------------------------------------------------------------------|-----------------|----------------------|----------------|----------------------------|-----------------------------|
| Number of peaks in 1929 genome                                               | 122             | 89.2                 | 99.7           | 22                         | 498                         |
| Number of peaks in 1988 (1) genome                                           | 140             | 91.2                 | 98.9           | 20                         | 655                         |
| Number of peaks in 1988 (2) genome                                           | 94              | 87.7                 | 95.4           | 20                         | 729                         |
| Number of peaks in 2000 genome                                               | 92              | 86.9                 | 97             | 20                         | 644                         |
| Mean peak width in 1929 genome                                               | 204.5 kb        | 13.1                 | 312.7 kb       | 134.5 kb                   | 570.5 kb                    |
| Mean peak width in 1988 (1) genome                                           | 186.0 kb        | 20.8                 | 289.2 kb       | 127.9 kb                   | 549.7 kb                    |
| Mean peak width in 1988 (2) genome                                           | 216.4 kb        | 19.3                 | 294.6 kb       | 128.8 kb                   | 607.1 kb                    |
| Mean peak width in 2000 genome                                               | 199.5 kb        | 20.2                 | 289.3 kb       | 128.6 kb                   | 539.2 kb                    |
| Proportion of shared peaks in 1929 genome                                    | 0.415           | 15.9                 | 0.537          | 0.293                      | 0.761                       |
| Proportion of shared peaks in 1988 (1) genome                                | 0.687           | 27.3                 | 0.731          | 0.311                      | 0.919                       |
| Proportion of shared peaks in 1988 (2) genome                                | 0.869           | 86.7                 | 0.731          | 0.344                      | 0.939                       |
| Proportion of shared peaks in 2000 genome                                    | 0.754           | 46.9                 | 0.732          | 0.312                      | 0.918                       |
| Proportion of peaks shared by 2+ individuals among all 4 San Nicolas genomes | 0.439           | 15.4                 | 0.729          | 0.346                      | 0.789                       |

**Table S2. Statistics related to peaks of heterozygosity in empirical and simulated San Nicolas fox genomes. Related to Figure 1.** No empirical values fall outside of the middle 95% of values obtained through simulation.

| <b>Individual</b>                              | <b>Enrichment<br/>p-value</b> | <b>GO Term</b> | <b>Description</b>                                                     |
|------------------------------------------------|-------------------------------|----------------|------------------------------------------------------------------------|
| S. CA Gray Fox<br>(1932 genes in 861 peaks)    | 1.29E-16                      | GO:0050911     | Detection of chemical stimulus involved in sensory perception of smell |
|                                                | 1.46E-11                      | GO:0007186     | G-protein coupled receptor signaling pathway                           |
|                                                | 6.84E-11                      | GO:0005886     | Plasma membrane                                                        |
|                                                | 0.00576                       | GO:0045095     | Keratin filament                                                       |
|                                                | 0.0163                        | GO:0000786     | Nucleosome                                                             |
|                                                | 0.00556                       | GO:0005549     | Odorant binding                                                        |
|                                                | 1.29E-16                      | GO:0004984     | Olfactory receptor activity                                            |
|                                                | 0.0103                        | HP:0005356     | Decreased serum complement factor I                                    |
|                                                | 0.0432                        | KEGG:04610     | Complement and coagulation cascades                                    |
| N. CA Gray Fox<br>(2897 genes in 1109 peaks)   | 1.43E-16                      | KEGG:04740     | Olfactory transduction                                                 |
|                                                | 0.014                         | GO:0018101     | Protein citrullination                                                 |
|                                                | 0.00108                       | GO:0071944     | Cell periphery                                                         |
|                                                | 3.90E-13                      | GO:0005882     | Intermediate filament                                                  |
|                                                | 0.00317                       | GO:0016021     | Integral component of membrane                                         |
|                                                | 0.014                         | GO:0004668     | Protein-arginine deiminase activity                                    |
|                                                | 0.0209                        | GO:0060089     | Molecular transducer activity                                          |
| S. Catalina 1988<br>(3539 genes in 1213 peaks) | 0.00498                       | KEGG:04740     | Olfactory transduction                                                 |
|                                                | 0.0477                        | GO:0098662     | Inorganic cation transmembrane transport                               |
|                                                | 0.0331                        | GO:0045095     | Keratin filament                                                       |
| S. Catalina 2005<br>(3830 genes in 1349 peaks) | 0.000906                      | GO:0016021     | Integral component of membrane                                         |
|                                                | 1.23E-29                      | GO:0050906     | Detection of stimulus involved in sensory perception                   |
|                                                | 0.00278                       | GO:1900543     | Negative regulation of purine nucleotide metabolic process             |
|                                                | 1.65E-05                      | GO:0005882     | Intermediate filament                                                  |
|                                                | 1.32E-13                      | GO:0005886     | Plasma membrane                                                        |
|                                                | 4.66E-06                      | GO:0005549     | Odorant binding                                                        |
|                                                | 1.52E-29                      | GO:0004984     | Olfactory receptor activity                                            |
|                                                | 0.00587                       | GO:0004064     | Arylesterase activity                                                  |
|                                                | 3.64E-25                      | KEGG:04740     | Olfactory transduction                                                 |
| S. Clemente 1988<br>(2697 genes in 643 peaks)  | 0.00371                       | KEGG:04610     | Complement and coagulation cascades                                    |
|                                                | NA                            | NA             | NA                                                                     |
| S. Clemente 2009<br>(2342 genes in 617 peaks)  | NA                            | NA             | NA                                                                     |
| S. Cruz 1988<br>(3630 genes in 1203 peaks)     | 0.00413                       | KEGG:04924     | Renin secretion                                                        |
|                                                | 0.0295                        | KEGG:04713     | Circadian entrainment                                                  |
| S. Cruz 2008<br>(3575 genes in 1253 peaks)     | 0.0222                        | GO:0007399     | Nervous system development                                             |
|                                                | 0.027                         | GO:0048856     | Anatomical structure development                                       |
|                                                | 0.0143                        | GO:0008146     | Sulfotransferase activity                                              |
| S. Miguel 1988<br>(2506 genes in 614 peaks)    | NA                            | NA             | NA                                                                     |

|                                                 |            |                        |                                                                                                       |
|-------------------------------------------------|------------|------------------------|-------------------------------------------------------------------------------------------------------|
| S. Miguel 2008<br>(1966 genes in 431 peaks)     | 5.56E-06   | GO:0045095             | Keratin filament                                                                                      |
|                                                 | 0.0454     | HP:0010669             | Hypoplasia of the zygomatic bone                                                                      |
|                                                 | 0.0428     | HP:0002253             | Colonic diverticula                                                                                   |
|                                                 | 0.0106     | HP:0004428             | Elfin facies                                                                                          |
|                                                 | 0.0129     | HP:0000796             | Urethral obstruction                                                                                  |
|                                                 | 0.00157    | HP:0100025             | Overfriendliness                                                                                      |
|                                                 | 0.001      | HP:0002623             | Overriding aorta                                                                                      |
|                                                 | 0.042      | HP:0010780             | Hyperacusis                                                                                           |
|                                                 | 0.00157    | HP:0001361             | Nystagmus-induced head nodding                                                                        |
|                                                 | 0.042      | HP:0100817             | Renovascular hypertension                                                                             |
|                                                 | 0.000385   | HP:0007720             | Flat cornea                                                                                           |
|                                                 | 0.0227     | HP:0000015             | Bladder diverticulum                                                                                  |
|                                                 | 0.0221     | HP:0002183             | Phonophobia                                                                                           |
| S. Nicolas 1929<br>(531 genes in 122 peaks)     | 2.55E-07   | GO:0007186             | G-protein coupled receptor signaling pathway                                                          |
|                                                 | 5.38E-17   | GO:0007608             | Sensory perception of smell                                                                           |
|                                                 | 5.59E-17   | GO:0004984             | Olfactory receptor activity                                                                           |
|                                                 | 0.00578    | GO:0005549             | Odorant binding                                                                                       |
|                                                 | 3.57E-16   | KEGG:04740             | Olfactory transduction                                                                                |
| S. Nicolas 1988 (1)<br>(626 genes in 140 peaks) | 0.0229     | GO:0035095             | Behavioral response to nicotine                                                                       |
|                                                 | 5.61E-31   | GO:0007186             | G-protein coupled receptor signaling pathway                                                          |
|                                                 | 1.15E-43   | GO:0050907             | Detection of chemical stimulus involved in sensory perception                                         |
|                                                 | 3.79E-12   | GO:0016021             | Integral component of membrane                                                                        |
|                                                 | 0.000464   | GO:0004252             | Serine-type endopeptidase activity                                                                    |
|                                                 | 2.36E-05   | GO:0003823             | Antigen binding                                                                                       |
|                                                 | 0.00943    | GO:0004497             | Monooxygenase activity                                                                                |
|                                                 | 0.0126     | GO:0016705             | Oxidoreductase activity, acting on paired donors, with incorporation or reduction of molecular oxygen |
|                                                 | 2.94E-43   | GO:0004984             | Olfactory receptor activity                                                                           |
|                                                 | 0.0259     | GO:0005549             | Odorant binding                                                                                       |
| 8.42E-31                                        | KEGG:04740 | Olfactory transduction |                                                                                                       |
| S. Nicolas 1988 (2)<br>(440 genes in 94 peaks)  | 8.05E-19   | GO:0007608             | Sensory perception of smell                                                                           |
|                                                 | 0.0036     | GO:0035095             | Behavioral response to nicotine                                                                       |
|                                                 | 0.00871    | GO:0016021             | Integral component of membrane                                                                        |
|                                                 | 0.021      | GO:0005886             | Plasma membrane                                                                                       |
|                                                 | 1.16E-18   | GO:0004984             | Olfactory receptor activity                                                                           |
|                                                 | 2.21E-09   | GO:0005149             | Interleukin-1 receptor binding                                                                        |
|                                                 | 0.0241     | GO:0004252             | Serine-type endopeptidase activity                                                                    |
|                                                 | 0.0496     | HP:0002654             | Multiple epiphyseal dysplasia                                                                         |
|                                                 | 2.78E-15   | KEGG:04740             | Olfactory transduction                                                                                |
| S. Nicolas 2000<br>(379 genes in 92 peaks)      | 0.00689    | GO:0051716             | Cellular response to stimulus                                                                         |
|                                                 | 7.45E-26   | GO:0050907             | Detection of chemical stimulus involved in sensory perception                                         |
|                                                 | 6.62E-19   | GO:0007186             | G-protein coupled receptor signaling pathway                                                          |

|                                            |          |            |                                            |
|--------------------------------------------|----------|------------|--------------------------------------------|
|                                            | 0.0253   | GO:0031224 | Intrinsic component of membrane            |
|                                            | 7.46E-09 | GO:0005549 | Odorant binding                            |
|                                            | 0.000212 | GO:0004252 | Serine-type endopeptidase activity         |
|                                            | 7.43E-25 | GO:0004984 | Olfactory receptor activity                |
|                                            | 3.79E-20 | KEGG:04740 | Olfactory transduction                     |
| S. Rosa 1988<br>(3715 genes in 1235 peaks) | 0.00932  | KEGG:00590 | Arachidonic acid metabolism                |
| S. Rosa 2008<br>(3735 genes in 1209 peaks) | 0.018    | GO:0044763 | Single-organism cellular process           |
|                                            | 0.0218   | GO:0051216 | Cartilage development                      |
|                                            | 0.0389   | GO:0048149 | Behavioral response to ethanol             |
|                                            | 0.000344 | GO:0005887 | Integral component of plasma membrane      |
|                                            | 0.0329   | GO:0004499 | N,N-dimethylaniline monooxygenase activity |
|                                            | 0.000802 | KEGG:04080 | Neuroactive ligand-receptor interaction    |

**Table S3. Gene ontology enrichment results for peaks of heterozygosity in island and gray fox genomes. Related to Figure 1. Only terms with significant enrichment  $p$ -values ( $<0.05$ ) are shown.**

| Type                                                                                     | Null model MLE               | Alternative model MLE  | Likelihood ratio test                   |
|------------------------------------------------------------------------------------------|------------------------------|------------------------|-----------------------------------------|
| <b>Proportion of Homozygous Derived Genotypes (Gray Foxes v. 1988-2009 Island Foxes)</b> |                              |                        |                                         |
| Synonymous                                                                               | $q_i=q_g=0.320$              | $q_i=0.339, q_g=0.196$ | $\Lambda=6692.54, p<<10^{-16}$          |
| Tolerated                                                                                | $q_i=q_g=0.279$              | $q_i=0.298, q_g=0.157$ | $\Lambda=2480.20, p<<10^{-16}$          |
| Deleterious                                                                              | $q_i=q_g=0.208$              | $q_i=0.224, q_g=0.104$ | $\Lambda=808.49, p<<10^{-16}$           |
| Loss of function                                                                         | $q_i=q_g=0.234$              | $q_i=0.251, q_g=0.124$ | $\Lambda=40.44, p=2.03 \times 10^{-10}$ |
| <b>Proportion of Derived Alleles (Gray Foxes v. 1988-2009 Island Foxes)</b>              |                              |                        |                                         |
| Tolerated                                                                                | $q_i=1.002435q_g, q_g=0.326$ | $q_i=0.328, q_g=0.315$ | $\Lambda=31.60, p=1.89 \times 10^{-8}$  |
| Deleterious                                                                              | $q_i=1.002435q_g, q_g=0.251$ | $q_i=0.254, q_g=0.234$ | $\Lambda=32.72, p=1.06 \times 10^{-8}$  |
| Loss of function                                                                         | $q_i=1.002435q_g, q_g=0.282$ | $q_i=0.289, q_g=0.247$ | $\Lambda=6.76, p=9.33 \times 10^{-3}$   |
| <b>Proportion of Derived Alleles (Gray Foxes v. 1988 Island Foxes)</b>                   |                              |                        |                                         |
| Tolerated                                                                                | $q_i=1.001165q_g, q_g=0.325$ | $q_i=0.328, q_g=0.315$ | $\Lambda=30.20, p=3.90 \times 10^{-8}$  |
| Deleterious                                                                              | $q_i=1.001165q_g, q_g=0.252$ | $q_i=0.254, q_g=0.234$ | $\Lambda=40.56, p=1.91 \times 10^{-10}$ |
| Loss of function                                                                         | $q_i=1.001165q_g, q_g=0.285$ | $q_i=0.289, q_g=0.247$ | $\Lambda=8.53, p=3.50 \times 10^{-3}$   |
| <b>Proportion of Derived Alleles (Gray Foxes v. 2000-2009 Island Foxes)</b>              |                              |                        |                                         |
| Tolerated                                                                                | $q_i=1.003915q_g, q_g=0.324$ | $q_i=0.328, q_g=0.315$ | $\Lambda=25.40, p=4.66 \times 10^{-7}$  |
| Deleterious                                                                              | $q_i=1.003915q_g, q_g=0.246$ | $q_i=0.254, q_g=0.234$ | $\Lambda=18.24, p=1.95 \times 10^{-5}$  |
| Loss of function                                                                         | $q_i=1.003915q_g, q_g=0.271$ | $q_i=0.289, q_g=0.247$ | $\Lambda=3.67, p=5.56 \times 10^{-2}$   |

**Table S4. Comparisons of the proportion of homozygous derived genotypes and the proportion of derived alleles per individual between gray and island foxes. Related to Figure 2. Significant  $p$ -values ( $<0.05$ ) are in bold.**



|             | S. Catalina  | S. Clemente  | S. Cruz    | S. Miguel  | S. Nicolas | S. Rosa | Gray Fox |
|-------------|--------------|--------------|------------|------------|------------|---------|----------|
| S. Catalina |              | 2.00         | <i>Inf</i> | 2.58       | 7.33       | 2.50    | 3.75     |
| S. Clemente | 1.60         |              | NA         | 1.55       | 3.20       | 1.30    | 1.88     |
| S. Cruz     | <i>Inf</i>   | <i>Inf</i>   |            | 0          | 0          | 0       | 0        |
| S. Miguel   | 10.33*       | 7.75*        | 0          |            | 2.06       | 0.640   | 1.03     |
| S. Nicolas  | 1.30         | 0.977        | 0          | 0.176*     |            | 0.312   | 2.13     |
| S. Rosa     | NA           | NA           | NA         | <i>Inf</i> | <i>Inf</i> |         | 0.660    |
| Gray Fox    | <i>Inf</i> * | <i>Inf</i> * | NA         | 0          | 0          | NA      |          |

**Table S5. Relative risks of developmental and probable collision pathologies between island foxes and mainland gray fox morphological samples. Related to Figure 3.** Relative risks of developmental pathologies are above the diagonal and relative risks of probable collision pathologies are below the diagonal. The table is read: *Row* has X times the risk of pathology as *Column*. A zero represents no risk relative to the column; "*Inf*" represents cases where the column had no reported cases and the risk in the row population is thus infinitely greater. For collision pathologies, a comparison is not available (NA) between samples where neither sample contained probable collision pathologies. Asterisks denote risks significant below a 0.05 threshold based on the permutation test. For developmental pathologies, no relative risk results were statistically significant.

| Selection Strength (s) | $N_{\text{island}}$ | Additive Regime |             |                    |                   |                   | Recessive Regime |               |               |                    |                   | Fold-change   |                   |
|------------------------|---------------------|-----------------|-------------|--------------------|-------------------|-------------------|------------------|---------------|---------------|--------------------|-------------------|---------------|-------------------|
|                        |                     | Split           | Big Island  | Ancient Bottleneck | Serial Bottleneck | Recent Bottleneck | Inbreeding       | Split         | Big Island    | Ancient Bottleneck | Serial Bottleneck |               | Recent Bottleneck |
| [-1, -0.1)             | 1000                | 0.875           | 1.14        | 1.15               | 1.10              | 0.963             | 0.984            | <b>0.400</b>  | <b>0.395</b>  | <b>0.391</b>       | <b>0.314</b>      | <b>0.255</b>  | <b>0.138</b>      |
|                        | 500                 | 1.06            | 1.27        | 0.941              | 1.07              | 0.904             | 0.648            | <b>0.259</b>  | <b>0.268</b>  | <b>0.217</b>       | <b>0.251</b>      | <b>0.201</b>  | <b>0.0836</b>     |
|                        | 200                 | 1.19            | 1.30        | 0.850              | 1.05              | 0.718             | 1.61             | <b>0.131</b>  | <b>0.176</b>  | <b>0.154</b>       | <b>0.182</b>      | <b>0.0965</b> | <b>0.0777</b>     |
|                        | 100                 | 0.646           | 0.812       | 1.79               | 0.971             | 0.630             | 1.14             | <b>0.143</b>  | <b>0.0882</b> | <b>0.0677</b>      | <b>0.0549</b>     | <b>0.145</b>  | <b>0.0492</b>     |
|                        | 50                  | 0.450           | 1.97        | 1.60               | 1.91              | 3.15              | 2.47             | <b>0.0799</b> | <b>0.127</b>  | <b>0.122</b>       | <b>0.0750</b>     | <b>0.0507</b> | <b>0.0172</b>     |
| [-0.1, -0.01)          | 1000                | 1.03            | 0.953       | 1.00               | 1.05              | 1.17              | 1.03             | <b>0.330</b>  | <b>0.349</b>  | <b>0.335</b>       | <b>0.330</b>      | <b>0.341</b>  | <b>0.266</b>      |
|                        | 500                 | 1.17            | 1.02        | 1.08               | 1.03              | 1.29              | 0.928            | <b>0.241</b>  | <b>0.238</b>  | <b>0.267</b>       | <b>0.260</b>      | <b>0.253</b>  | <b>0.216</b>      |
|                        | 200                 | <b>2.19</b>     | 1.69        | 2.04               | <b>2.24</b>       | <b>2.67</b>       | 1.95             | <b>0.316</b>  | <b>0.255</b>  | <b>0.304</b>       | <b>0.286</b>      | <b>0.298</b>  | <b>0.233</b>      |
|                        | 100                 | <b>9.55</b>     | <b>8.39</b> | <b>9.05</b>        | <b>9.16</b>       | <b>11.0</b>       | <b>9.89</b>      | 1.04          | <b>0.742</b>  | 0.905              | 0.905             | 0.906         | 0.962             |
|                        | 50                  | <b>26.6</b>     | <b>22.8</b> | <b>27.6</b>        | <b>29.8</b>       | <b>28.2</b>       | <b>29.1</b>      | <b>2.36</b>   | <b>1.95</b>   | <b>2.39</b>        | <b>2.25</b>       | <b>2.26</b>   | <b>2.45</b>       |
| [-0.01, -0.001)        | 1000                | <b>1.74</b>     | <b>1.63</b> | <b>1.87</b>        | <b>1.88</b>       | <b>1.76</b>       | <b>1.74</b>      | <b>0.630</b>  | <b>0.605</b>  | <b>0.651</b>       | <b>0.682</b>      | <b>0.609</b>  | <b>0.605</b>      |
|                        | 500                 | <b>3.51</b>     | <b>3.18</b> | <b>3.29</b>        | <b>3.58</b>       | <b>3.31</b>       | <b>3.25</b>      | 1.02          | <b>0.867</b>  | 1.01               | 0.993             | 0.998         | 1.00              |
|                        | 200                 | <b>7.03</b>     | <b>6.16</b> | <b>6.82</b>        | <b>7.00</b>       | <b>6.72</b>       | <b>6.57</b>      | <b>1.74</b>   | <b>1.42</b>   | <b>1.75</b>        | <b>1.79</b>       | <b>1.77</b>   | <b>1.81</b>       |
|                        | 100                 | <b>9.65</b>     | <b>8.36</b> | <b>9.46</b>        | <b>9.48</b>       | <b>10.3</b>       | <b>9.73</b>      | <b>2.34</b>   | <b>1.82</b>   | <b>2.30</b>        | <b>2.36</b>       | <b>2.27</b>   | <b>2.26</b>       |
|                        | 50                  | <b>11.3</b>     | <b>9.87</b> | <b>11.8</b>        | <b>12.1</b>       | <b>11.8</b>       | <b>12.1</b>      | <b>2.66</b>   | <b>2.20</b>   | <b>2.71</b>        | <b>2.67</b>       | <b>2.61</b>   | <b>2.63</b>       |
| [-0.001, 0)            | 1000                | <b>1.09</b>     | <b>1.07</b> | <b>1.13</b>        | <b>1.11</b>       | <b>1.07</b>       | <b>1.10</b>      | <b>1.05</b>   | 1.03          | <b>1.05</b>        | 1.04              | 1.03          | 1.02              |
|                        | 500                 | <b>1.11</b>     | <b>1.12</b> | <b>1.12</b>        | <b>1.12</b>       | <b>1.12</b>       | <b>1.10</b>      | <b>1.07</b>   | <b>1.06</b>   | <b>1.08</b>        | <b>1.08</b>       | <b>1.08</b>   | <b>1.06</b>       |
|                        | 200                 | <b>1.13</b>     | <b>1.12</b> | <b>1.14</b>        | <b>1.14</b>       | <b>1.13</b>       | <b>1.16</b>      | <b>1.11</b>   | <b>1.09</b>   | <b>1.10</b>        | <b>1.09</b>       | <b>1.11</b>   | <b>1.11</b>       |
|                        | 100                 | <b>1.13</b>     | <b>1.12</b> | <b>1.12</b>        | <b>1.13</b>       | <b>1.13</b>       | <b>1.13</b>      | <b>1.10</b>   | <b>1.09</b>   | <b>1.10</b>        | <b>1.11</b>       | <b>1.09</b>   | <b>1.11</b>       |
|                        | 50                  | <b>1.15</b>     | <b>1.12</b> | <b>1.15</b>        | <b>1.15</b>       | <b>1.15</b>       | <b>1.15</b>      | <b>1.10</b>   | <b>1.09</b>   | <b>1.11</b>        | <b>1.11</b>       | <b>1.12</b>   | <b>1.11</b>       |
| [-1, 0)                | 1000                | <b>1.10</b>     | <b>1.08</b> | <b>1.14</b>        | <b>1.12</b>       | <b>1.08</b>       | <b>1.11</b>      | 1.00          | 0.989         | 1.01               | 0.997             | 0.987         | 0.976             |
|                        | 500                 | <b>1.15</b>     | <b>1.14</b> | <b>1.15</b>        | <b>1.16</b>       | <b>1.14</b>       | <b>1.13</b>      | <b>1.05</b>   | 1.03          | <b>1.06</b>        | <b>1.05</b>       | <b>1.05</b>   | 1.03              |
|                        | 200                 | <b>1.22</b>     | <b>1.19</b> | <b>1.22</b>        | <b>1.22</b>       | <b>1.21</b>       | <b>1.23</b>      | <b>1.13</b>   | <b>1.09</b>   | <b>1.12</b>        | <b>1.12</b>       | <b>1.14</b>   | <b>1.14</b>       |
|                        | 100                 | <b>1.25</b>     | <b>1.23</b> | <b>1.24</b>        | <b>1.25</b>       | <b>1.26</b>       | <b>1.25</b>      | <b>1.18</b>   | <b>1.13</b>   | <b>1.18</b>        | <b>1.19</b>       | <b>1.16</b>   | <b>1.18</b>       |
|                        | 50                  | <b>1.32</b>     | <b>1.27</b> | <b>1.33</b>        | <b>1.34</b>       | <b>1.33</b>       | <b>1.33</b>      | <b>1.23</b>   | <b>1.18</b>   | <b>1.24</b>        | <b>1.24</b>       | <b>1.24</b>   | <b>1.24</b>       |
| 0                      | 1000                | 1.01            | 1.01        | 0.988              | 1.01              | 1.01              | 1.01             | 1.00          | 1.00          | 1.00               | 0.995             | 1.00          | 1.01              |
|                        | 500                 | 1.01            | 1.01        | 0.997              | 1.02              | 1.01              | 0.997            | 1.01          | 1.00          | 1.01               | 1.02              | 0.999         | 1.00              |
|                        | 200                 | 1.01            | 0.995       | 0.997              | 0.993             | 0.983             | 1.01             | 1.01          | 1.01          | 0.992              | 0.987             | 0.990         | 0.993             |
|                        | 100                 | 1.02            | 0.995       | 1.01               | 1.00              | 0.994             | 1.00             | 1.01          | 0.993         | 0.985              | 0.996             | 0.983         | 0.987             |
|                        | 50                  | 0.987           | 0.996       | 1.01               | 0.997             | 1.00              | 0.979            | 0.999         | 0.996         | 1.01               | 1.00              | 1.01          | 1.00              |

**Table S6. Results from forward simulations of neutral and deleterious variation with different island population sizes. Related to Figure 4.** Pictorial depictions of demographic models are shown in Figure 4A of the main text. The value in each cell represents the mean fold-change in the total number of alleles per individual in the island population relative to the mainland. For example, a value of 1.00 indicates no difference in the average number of alleles between the island and mainland, a value of 0.50 indicates that island individuals have half as many alleles relative to the mainland on average, and a value of 2.00 indicates that island individuals have twice as many alleles relative to the mainland on average. Cells are color-coded according to their value, such that blue indicates a depletion (fold-change <1.00) and red indicates an enrichment (fold-change >1.00) of the number of alleles per individual on the island relative to the mainland. The enrichment color intensity is capped at 2-fold enrichment. Values that are significant ( $p < 0.05$ ) are bold and italicized.

### **Supplemental References**

- S1. McLaren, W., Pritchard, B., Rios, D., Chen, Y., Flicek, P. and Cunningham, F. (2010). Deriving the consequences of genomic variants with the Ensembl API and SNP Effect Predictor. *Bioinformatics* 26, 2069-2070.
- S2. Kumar, P., Henikoff, S. and Ng, P.C. (2009). Predicting the effects of coding non-synonymous variants on protein function using the SIFT algorithm. *Nat. Protoc.* 4, 1073-1081.
- S3. Robinson, J.A., Ortega-Del Vecchyo, D., Fan, Z., Kim, B.Y., Marsden, C.D., Lohmueller, K.E. and Wayne, R.K. (2016). Genomic flatlining in the endangered island fox. *Curr. Biol.* 26, 1183-1189.
